# Supplementary material
Source: publisher figshare collection journal article supplement (https://future-science-group.figshare.com/articles/dataset/_/22132925)
Supplement: Supplementary file 1 [file 1]

## Sheet: Table S2
Table S2 Differentially expressed tsRNAs in endometrial cancer
tsRNA	Log2(Fold Change)	Adjusted P Value	Type	Parental tRNA	Sequence
tRF-22-L7S5QKF14	5.22449	1.56766e-29	i-tRF	Asp-GTC	CGCCTGTCACGCGGGAGACCGG
tRF-24-SWRYVMMVHX	3.70296	1.81753e-17	i-tRF	Glu-TTC	GTCGTGGTTGTAGTCCGTGCGAGA
tRF-18-8R1546D2	3.25733	9.32783e-25	3'-tRF	Ala-AGC	TCCCCAGTACCTCCACCA
tRF-29-RRJ89O9NF5JP	3.16127	1.25395e-15	5'-tRF	Gln-TTG	GGTCCCATGGTGTAATGGTTAGCACTCTG
tRF-30-RKVP4P93FJIY	3.16122	3.01579e-16	5'-tRF	Cys-GCA	GGGGGTATAGCTCAGTGGGTAGAGCATTTG
tRF-19-RKVP4PJY	2.93628	5.06739e-16	5'-tRF	Cys-GCA	GGGGGTATAGCTCAGTGGG
tRF-18-O7M8LOD4	2.89342	1.05674e-15	5'-tRF	Trp-CCA	GACCTCGTGGCGCAACGG
tRF-20-6S7P4PWJ	2.81051	3.82298e-16	5'-tRF	Ile-AAT	GGCCGGTTAGCTCAGTCGGC
tRF-18-O7M8LO04	2.72223	2.67695e-14	5'-tRF	Trp-CCA	GACCTCGTGGCGCAATGG
tRF-20-6998NPZJ	2.68278	4.80847e-19	5'-tRF	Thr-CGT	GGCTCTGTGGCTTAGTTGGC
tRF-19-PS5P4PJ4	2.62445	9.37003e-15	5'-tRF	Lys-TTT	GCCCGGATAGCTCAGTCGG
tRF-16-K5J0W1B	2.47342	2.24097e-12	3'-tRF	Arg-TCT	CCCACCAGAGTCGCCA
tRF-29-RPM830MMUK1W	2.41543	1.80692e-09	5'-tRF	Leu-AAG	GGTAGCGTGGCCGAGCGGTCTAAGGCGCT
tRF-21-R3ZV1RY1B	2.31209	6.041e-07	3'-tRF	Ala-TGC	GGGGTTTTGCAGTCCTTACCA
tRF-20-S998LO9D	2.28791	1.03338e-07	5'-tRF	Arg-TCT	GTCTCTGTGGCGCAATGGAC
tRF-19-R9JP9P1Z	2.16569	8.46914e-14	5'-tRF	Val-TAC	GGTTCCATAGTGTAGCGGT
tRF-29-5SVP9N15WV2P	2.12681	6.79183e-07	i-tRF	His-GTG	GATCGTATAGTGGTTAGTACTCTGCGTTG
tRF-17-86K2SV2	2.1153	5.36194e-10	3'-tRF	Arg-TCT	TCCCACCAGAGTCGCCA
tRF-19-6SM83OJX	2.07977	6.9979e-11	5'-tRF	Arg-CCG	GGCCGCGTGGCCTAATGGA
tRF-25-R95933JKB6	2.05561	9.05715e-14	3'-tRF	Glu-TTC	GGTTCGATTCCCGGTCAGGGAACCA
tRF-19-Q99P9PJZ	1.97942	2.21168e-08	5'-tRF	Val-CAC	GCTTCTGTAGTGTAGTGGT
tRF-19-S998LOJX	1.95307	3.62003e-07	5'-tRF	Arg-TCT	GTCTCTGTGGCGCAATGGA
tRF-25-8DYDZDL9X1	1.9364	3.74718e-12	3'-tRF	Val-TAC	TCAACTTAACTTGACCGCTCTGACC
tRF-18-R29P4P04	1.91574	1.0212e-09	5'-tRF	Ala-CGC	GGGGATGTAGCTCAGTGG
tRF-21-XXH6Z4NYD	1.88122	8.57252e-11	i-tRF	Ser-GCT	TGCTAATCCATTGTGCTTTGC
tRF-23-R95933JKR	1.8669	5.17208e-09	3'-tRF	Glu-TTC	GGTTCGATTCCCGGTCAGGGAAC
tRF-24-6VR8K09LE9	1.79751	1.95314e-11	5'-tRF	Thr-CGT	GGCGCGGTGGCCAAGTGGTAAGGC
tRF-18-6SM83O04	1.78578	3.65483e-08	5'-tRF	Arg-CCG	GGCCGCGTGGCCTAATGG
tRF-18-OSM83O04	1.78445	2.38396e-08	5'-tRF	Arg-TCG	GACCGCGTGGCCTAATGG
tRF-19-PSQP4PJ4	1.77443	9.59075e-08	5'-tRF	Lys-CTT	GCCCGGCTAGCTCAGTCGG
tRF-30-R9JP9PMNH5SY	1.75562	1.78396e-06	5'-tRF	Val-TAC	GGTTCCATAGTGTAGCGGTTATCACGTCTG
tRF-19-O6M83OJX	1.74835	1.2025e-09	5'-tRF	Arg-TCG	GACCACGTGGCCTAATGGA
tRF-29-RKVP4PRL5FKP	1.73353	1.08111e-07	5'-tRF	Cys-GCA	GGGGGTATAGCTCAGGGGTAGAGCATTTG
tRF-17-7PU9XWP	1.7184	4.56577e-07	i-tRF	His-GTG	GTTAGTACTCTGCGTTG
tRF-30-6RJ89O9NF5W8	1.71608	2.32116e-05	5'-tRF	Gln-TTG	GGCCCCATGGTGTAATGGTTAGCACTCTGG
tRF-25-OUR8309NDJ	1.65779	8.44554e-07	5'-tRF	Ser-GCT	GACGAGGTGGCCGAGTGGTTAAGGC
tRF-19-RRJ89OJZ	1.65271	5.24288e-09	5'-tRF	Gln-TTG	GGTCCCATGGTGTAATGGT
tRF-30-7EMQ18Y3E7QN	1.65204	2.13821e-06	i-tRF	His-GTG	GTGATCGTATAGTGGTTAGTACTCTGCGTT
tRF-20-Q99P9P9N	1.60097	0.00014454	5'-tRF	Val-CAC	GCTTCTGTAGTGTAGTGGTT
tRF-24-RPM830MM2S	1.59247	5.11748e-12	5'-tRF	Leu-AAG	GGTAGCGTGGCCGAGCGGTCTAAG
tRF-19-S998LOJ4	1.57932	2.87647e-09	5'-tRF	Asn-GTT	GTCTCTGTGGCGCAATCGG
tRF-26-Z6EXEY0VWUD	1.57743	1.25568e-05	3'-tRF	Val-TAC	TTTCAACTTAACTTGACCGCTCTGAC
tRF-26-R9JP9P9NH50	1.57275	2.59006e-05	5'-tRF	Val-TAC	GGTTCCATAGTGTAGTGGTTATCACG
tRF-27-Z6EXEY0VWUJ	1.551	1.46245e-07	3'-tRF	Val-TAC	TTTCAACTTAACTTGACCGCTCTGACC
tRF-23-MQ18Y3E7D8	1.54273	1.93959e-06	i-tRF	His-GTG	CGTATAGTGGTTAGTACTCTGCG
tRF-26-RPM830MMUKD	1.48529	9.94834e-07	5'-tRF	Leu-AAG	GGTAGCGTGGCCGAGCGGTCTAAGGC
tRF-22-7SIRMM121	1.48049	5.40398e-06	3'-tRF	Glu-TTC	GTTCGATTCCCGGTCAGGGAAC
tRF-20-RKIP4OI3	1.48007	2.05522e-08	5'-tRF	Ala-AGC	GGGGGATTAGCTCAAATGGT
tRF-26-PS5P4PW3FJB	1.46269	9.41246e-07	5'-tRF	Lys-TTT	GCCCGGATAGCTCAGTCGGTAGAGCA
tRF-27-WLV47PU9XWP	1.46182	2.86627e-05	i-tRF	His-GTG	TCGTATAGTGGTTAGTACTCTGCGTTG
tRF-30-PW5SVP9N15WV	1.46133	0.00013191	5'-tRF	His-GTG	GCCGTGATCGTATAGTGGTTAGTACTCTGC
tRF-28-P4R8YP9LOND5	1.39791	0.000188744	5'-tRF	Gly-GCC	GCATGGGTGGTTCAGTGGTAGAATTCTC
tRF-19-OSM83OJX	1.39664	3.7566e-06	5'-tRF	Arg-TCG	GACCGCGTGGCCTAATGGA
tRF-17-YSQSD2J	1.37634	0.000172301	3'-tRF	Tyr-GTA	TTCCGGCTCGAAGGACC
tRF-18-RXSINH0P	1.36663	4.80037e-06	i-tRF	His-GTG	GGTTAGTACTCTGCGTTG
tRF-30-Q99P9P9NH57S	1.36302	0.000216336	5'-tRF	Val-CAC	GCTTCTGTAGTGTAGTGGTTATCACGTTCG
tRF-24-7SIRMM12E2	1.35482	2.87661e-09	3'-tRF	Glu-TTC	GTTCGATTCCCGGTCAGGGAACCA
tRF-24-8DYDZDL9JR	1.29721	7.94231e-05	3'-tRF	Val-TAC	TCAACTTAACTTGACCGCTCTGAC
tRF-30-R9JP9P9NH5SY	1.28906	7.40255e-05	5'-tRF	Val-TAC	GGTTCCATAGTGTAGTGGTTATCACGTCTG
tRF-24-R95933JK0V	1.28702	0.000150602	3'-tRF	Glu-TTC	GGTTCGATTCCCGGTCAGGGAACC
tRF-28-I9BZBZOS4YV	1.28044	2.24207e-05	3'-tRF	Val-TAC	ATTTCAACTTAACTTGACCGCTCTGACC
tRF-18-40KK5Y04	1.25044	9.02014e-06	i-tRF	Arg-CCT	CTAAGCCAGGGATTGTGG
tRF-26-MQ18Y3E7QN0	1.24812	0.000289769	i-tRF	His-GTG	CGTATAGTGGTTAGTACTCTGCGTTG
tRF-24-WLV47PU9J8	1.24538	3.20292e-05	i-tRF	His-GTG	TCGTATAGTGGTTAGTACTCTGCG
tRF-26-YONONU3INDD	1.24045	4.76658e-05	3'-tRF	Val-TAC	TTCAACTTAACTTGACCGCTCTGACC
tRF-24-2IUIX1Q7HV	1.23976	3.02818e-06	3'-tRF	Val-TAC	CAACTTAACTTGACCGCTCTGACC
tRF-23-RPM830MM0F	1.21847	1.53532e-06	5'-tRF	Leu-AAG	GGTAGCGTGGCCGAGCGGTCTAA
tRF-19-PR183OJX	1.21298	0.000169689	5'-tRF	Arg-CCT	GCCCCAGTGGCCTAATGGA
tRF-22-EXEY0VWUJ	1.18724	6.20424e-06	3'-tRF	Val-TAC	ACTTAACTTGACCGCTCTGACC
tRF-30-RRJ89O9NF5W8	1.17724	0.000577066	5'-tRF	Gln-TTG	GGTCCCATGGTGTAATGGTTAGCACTCTGG
tRF-21-R959KUMKB	1.1716	0.00165622	i-tRF	Asp-GTC	GGTTCGATTCCCCGACGGGGA
tRF-21-RPM830MME	1.17078	6.28006e-07	5'-tRF	Leu-AAG	GGTAGCGTGGCCGAGCGGTCT
tRF-21-EXEY0VWUD	1.16442	0.000101081	3'-tRF	Val-TAC	ACTTAACTTGACCGCTCTGAC
tRF-24-RXPIN24YED	1.15869	0.000921755	i-tRF	Gln-CTG	GGTTAGCACTCTGGACTCTGAATC
tRF-18-PR183O04	1.15732	0.00204254	5'-tRF	Arg-CCT	GCCCCAGTGGCCTAATGG
tRF-23-BZBZOS4YV	1.15473	2.34175e-06	3'-tRF	Val-TAC	AACTTAACTTGACCGCTCTGACC
tRF-22-RK9P4P9LL	1.13942	2.11882e-05	5'-tRF	Cys-GCA	GGGGGTGTAGCTCAGTGGTAGA
tRF-30-RPM830MMUKLY	1.1339	0.00102148	5'-tRF	Leu-AAG	GGTAGCGTGGCCGAGCGGTCTAAGGCGCTG
tRF-22-I3VF4YOZP	1.13191	0.000113808	i-tRF	Gln-TTG	ATGGTTAGCACTCTGGACTTTG
tRF-30-79MP9P9MH57S	1.12941	0.0008778	5'-tRF	Val-AAC	GTTTCCGTAGTGTAGTGGTCATCACGTTCG
tRF-24-R3VJ4ZZ5FV	1.1261	0.00013191	3'-tRF	Tyr-GTA	GGGGTTAGGCCTCTTTTTACCACC
tRF-18-RRJ89O04	1.12374	0.000204303	5'-tRF	Gln-TTG	GGTCCCATGGTGTAATGG
tRF-17-8R6546J	1.11678	9.03667e-05	3'-tRF	Ala-AGC	TCCCCGGCACCTCCACC
tRF-21-18Y3E7QN0	1.10073	0.000127408	i-tRF	His-GTG	AGTGGTTAGTACTCTGCGTTG
tRF-19-UIX1Q7HV	1.09979	7.01901e-06	3'-tRF	Val-TAC	TAACTTGACCGCTCTGACC
tRF-22-RPM830MMO	1.09557	4.78871e-07	5'-tRF	Leu-AAG	GGTAGCGTGGCCGAGCGGTCTA
tRF-20-RK9P4P9L	1.08451	0.000136419	5'-tRF	Cys-GCA	GGGGGTGTAGCTCAGTGGTA
tRF-21-I3VF4YOZE	1.0728	0.000426172	i-tRF	Gln-TTG	ATGGTTAGCACTCTGGACTTT
tRF-25-S3M8309NDJ	1.06973	0.000139189	5'-tRF	Ser-TGA	GTAGTCGTGGCCGAGTGGTTAAGGC
tRF-19-9N15WV2P	1.05639	0.000116546	i-tRF	His-GTG	TGGTTAGTACTCTGCGTTG
tRF-20-6SM83O9E	1.04258	0.000289769	5'-tRF	Arg-CCG	GGCCGCGTGGCCTAATGGAT
tRF-25-0P58309NDJ	1.01651	0.000172383	5'-tRF	Leu-TAA	ACCAGGATGGCCGAGTGGTTAAGGC
tRF-19-PRR83OJX	1.01481	0.000910995	5'-tRF	Arg-CCT	GCCCCGGTGGCCTAATGGA
tRF-23-U1J0SU9EDL	-1.00255	0.00176654	i-tRF	Met-CAT	TAACCCAGAGGTCGATGGATCGA
tRF-18-I8W47WZ	-1.02467	0.000880214	i-tRF	Glu-TTC	ATTGGTCGTGGTTGTAGT
tRF-30-86V8WPMN1E8Y	-1.02852	0.00281296	5'-tRF	Glu-TTC	TCCCATATGGTCTAGCGGTTAGGATTCCTG
tRF-22-1XDDZZ4Y1	-1.05273	0.000803955	3'-tRF	Pro-TGG	AGTTAAAGACTTTTTCTCTGAC
tRF-23-PS5P4PW3X	-1.06982	2.986e-07	5'-tRF	Lys-TTT	GCCCGGATAGCTCAGTCGGTAGA
tRF-21-RS9NS334D	-1.07785	1.76369e-05	i-tRF	Glu-TTC	GGTCGTGGTTGTAGTCCGTGC
tRF-22-PS5P4PW3H	-1.08029	6.80936e-05	5'-tRF	Lys-TTT	GCCCGGATAGCTCAGTCGGTAG
tRF-21-I8W47W1R0	-1.11109	0.000140606	i-tRF	Glu-TTC	ATTGGTCGTGGTTGTAGTCCG
tRF-21-VBY9PYKHD	-1.12257	0.000178602	i-tRF	Gly-GCC	TAGAATTCTCGCCTGCCACGC
tRF-22-WB8689SV2	-1.14547	5.02128e-07	3'-tRF	Ser-GCT	TCGAATCCCATCCTCGTCGCCA
tRF-22-WB8647O52	-1.18401	0.000343574	3'-tRF	Leu-CAG	TCGAATCCCACTCCTGACACCA
tRF-21-YDZDL9X1B	-1.21489	8.00568e-10	3'-tRF	Val-TAC	TTAACTTGACCGCTCTGACCA
tRF-23-NL5RYKWIDZ	-1.22001	0.00265678	i-tRF	Tyr-GTA	CTGTAGATCCTTAGGTCGCTGGT
tRF-23-86J8WPMNY	-1.24691	1.08026e-10	5'-tRF	Glu-TTC	TCCCACATGGTCTAGCGGTTAGG
tRF-17-9N15WVN	-1.27568	9.41246e-07	i-tRF	His-GTG	TGGTTAGTACTCTGCGT
tRF-22-5BF900BY3	-1.30461	2.21059e-09	5'-tRF	Ser-GCT	GAGAAAGCTCACAAGAACTGCT
tRF-22-8EKSP1852	-1.30787	0.000287545	3'-tRF	Ala-AGC	TCAATCCCCGGCACCTCCACCA
tRF-22-WEKSPM852	-1.33428	7.5059e-05	3'-tRF	Ala-TGC	TCGATCCCCGGCATCTCCACCA
tRF-19-9M739PJK	-1.37006	3.40011e-05	i-tRF	Glu-TTC	TGGTCGTGGTTGTAGTCCG
tRF-20-Z3M8ZLSS	-1.38521	7.1745e-06	i-tRF	Glu-TTC	TTGGTCGTGGTTGTAGTCCG
tRF-22-WE884U1D2	-1.388	2.86627e-05	3'-tRF	Tyr-GTA	TCGATTCCGGCTCGAAGGACCA
tRF-18-7X9PN5D5	-1.4034	0.000114092	5'-tRF	Phe-GAA	GTTTATGTAGCTTACCTC
tRF-22-WB86N7O52	-1.40415	1.30155e-05	3'-tRF	Leu-CAA	TCGAATCCCACTTCTGACACCA
tRF-27-Z3M8ZLSSXUL	-1.40868	2.9925e-05	i-tRF	Glu-TTC	TTGGTCGTGGTTGTAGTCCGTGCGAGA
tRF-23-Z3M8ZLSS0M	-1.41071	1.20448e-07	i-tRF	Glu-TTC	TTGGTCGTGGTTGTAGTCCGTGC
tRF-19-BZOS4YE2	-1.42883	8.17073e-07	3'-tRF	Val-TAC	AACTTGACCGCTCTGACCA
tRF-27-739P8WQ0D52	-1.4341	6.03817e-06	3'-tRF	Glu-TTC	GTGGTTGTAGTCCGTGCGAGAATACCA
tRF-19-5BF9000W	-1.45686	2.16718e-11	5'-half	Ser-GCT	GAGAAAGCTCACAAGAACT
tRF-23-9M739P8WD8	-1.48342	1.58497e-07	i-tRF	Glu-TTC	TGGTCGTGGTTGTAGTCCGTGCG
tRF-22-JYSWRYVMK	-1.48556	2.60184e-08	i-tRF	Glu-TTC	CATTGGTCGTGGTTGTAGTCCG
tRF-23-897PVP94Z	-1.49803	3.71543e-10	5'-tRF	Asp-GTC	TCCTCGTTAGTATAGTGGTGAGT
tRF-29-V6Z3M8ZLSSJ8	-1.50038	1.35542e-05	i-tRF	Glu-TTC	TATCATTGGTCGTGGTTGTAGTCCGTGCG
tRF-19-I8W47WFD	-1.5385	1.32388e-05	i-tRF	Glu-TTC	ATTGGTCGTGGTTGTAGTC
tRF-18-YPSV17DJ	-1.54368	1.29051e-06	i-tRF	Leu-CAG	TTCAGGTCGCAGTCTCCC
tRF-19-V47PU9J8	-1.55707	9.86448e-12	i-tRF	His-GTG	TAGTGGTTAGTACTCTGCG
tRF-30-9M739P8WQ0D5	-1.55786	6.54207e-08	3'-tRF	Glu-TTC	TGGTCGTGGTTGTAGTCCGTGCGAGAATAC
tRF-18-S3M83004	-1.58094	8.45911e-10	5'-tRF	Ser-TGA	GTAGTCGTGGCCGAGTGG
tRF-16-ZDL9X1B	-1.60467	2.74584e-12	3'-tRF	Val-TAC	TTGACCGCTCTGACCA
tRF-24-OR183O9E0Y	-1.65247	3.50555e-09	5'-tRF	Arg-CCG	GACCCAGTGGCCTAATGGATAAGG
tRF-22-HQ9M739P5	-1.65777	1.80692e-09	i-tRF	Glu-TTC	ATCATTGGTCGTGGTTGTAGTC
tRF-21-U0EZY9X1B	-1.66084	1.25395e-15	3'-tRF	Pro-TGG	TAAAGACTTTTTCTCTGACCA
tRF-19-7X9PN5HJ	-1.69514	6.9979e-11	5'-tRF	Phe-GAA	GTTTATGTAGCTTACCTCC
tRF-18-Z3M8ZL0D	-1.75995	1.8635e-06	i-tRF	Glu-TTC	TTGGTCGTGGTTGTAGTC
tRF-29-Z3M8ZLSSXUH7	-1.76677	5.79167e-09	i-tRF	Glu-TTC	TTGGTCGTGGTTGTAGTCCGTGCGAGAAT
tRF-24-VUUMHNU6E2	-1.77543	1.19604e-08	3'-tRF	Arg-TCG	TATGATAATCATATTTACCAACCA
tRF-22-86J8WPMNH	-1.77569	1.10539e-17	5'-tRF	Glu-TTC	TCCCACATGGTCTAGCGGTTAG
tRF-20-I8W47W1R	-1.78365	1.73883e-07	i-tRF	Glu-TTC	ATTGGTCGTGGTTGTAGTCC
tRF-19-Z3M8ZL2J	-1.89562	2.16447e-08	i-tRF	Glu-TTC	TTGGTCGTGGTTGTAGTCC
tRF-21-2Q2RJO01B	-1.91799	3.01579e-16	3'-tRF	Phe-GAA	CACATCACCCCATAAACACCA
tRF-21-9M739P8W0	-1.92366	5.3652e-11	i-tRF	Glu-TTC	TGGTCGTGGTTGTAGTCCGTG
tRF-20-JYSWRYVM	-1.9543	7.60341e-11	i-tRF	Glu-TTC	CATTGGTCGTGGTTGTAGTC
tRF-24-V6Z3M8ZL2J	-1.96818	2.58705e-10	i-tRF	Glu-TTC	TATCATTGGTCGTGGTTGTAGTCC
tRF-20-7X9PN547	-1.9903	5.0381e-13	5'-tRF	Phe-GAA	GTTTATGTAGCTTACCTCCT
tRF-18-EY0VWUD2	-1.99999	1.17703e-17	3'-tRF	Val-TAC	ACTTGACCGCTCTGACCA
tRF-23-86V8WPMNY	-2.01299	2.97425e-19	5'-tRF	Glu-TTC	TCCCATATGGTCTAGCGGTTAGG
tRF-22-WB8US5652	-2.04414	3.64047e-18	3'-tRF	His-GTG	TCGAATCCGAGTCACGGCACCA
tRF-16-4ZUPX1B	-2.04848	1.50287e-15	3'-tRF	Lys-TTT	CTCTTTACAGTGACCA
tRF-29-JYSWRYVMMVHX	-2.12106	1.97704e-11	i-tRF	Glu-TTC	CATTGGTCGTGGTTGTAGTCCGTGCGAGA
tRF-30-HMI8W47W1R7H	-2.12506	2.58705e-10	i-tRF	Glu-TTC	ATATCATTGGTCGTGGTTGTAGTCCGTGCG
tRF-23-V6Z3M8ZL0D	-2.13818	2.7839e-12	i-tRF	Glu-TTC	TATCATTGGTCGTGGTTGTAGTC
tRF-21-JYSWRYVMD	-2.15801	1.19963e-14	i-tRF	Glu-TTC	CATTGGTCGTGGTTGTAGTCC
tRF-20-45DBNIB9	-2.19161	2.47366e-15	i-tRF	Ser-GCT	CTCACAAGAACTGCTAACTC
tRF-17-NU3IND2	-2.30825	1.5463e-22	3'-tRF	Val-TAC	CTTGACCGCTCTGACCA
tRF-22-9M739P8WM	-2.35303	1.05242e-21	i-tRF	Glu-TTC	TGGTCGTGGTTGTAGTCCGTGC
tRF-18-H5KQBFD2	-2.42871	8.72297e-24	3'-tRF	Phe-GAA	ATCACCCCATAAACACCA
tRF-22-YJE76INB5	-2.43459	1.69479e-23	i-tRF	Gln-CTG	TTAGCACTCTGGACTCTGAATC
tRF-23-YJE76INB0J	-2.5583	4.34974e-23	i-tRF	Gln-CTG	TTAGCACTCTGGACTCTGAATCC
tRF-19-J6K6UDE2	-2.56256	2.19918e-23	3'-tRF	Phe-GAA	CATCACCCCATAAACACCA
tRF-24-XSXMSL732Z	-2.6399	9.67926e-13	5'-tRF	His-GTG	TGCCGTGATCGTATAGTGGTTAGT
tRF-17-37YF7D2	-2.65375	6.42128e-27	3'-tRF	Lys-TTT	CCTCTTTACAGTGACCA
tRF-20-40KK5Y93	-2.72468	1.01655e-14	i-tRF	Arg-CCT	CTAAGCCAGGGATTGTGGGT
tRF-22-VF4YO9XEJ	-2.77851	4.33128e-28	i-tRF	Gln-CTG	TAGCACTCTGGACTCTGAATCC
tRF-19-27NXJ4E2	-2.79769	4.08894e-28	3'-tRF	Lys-TTT	CACCTCTTTACAGTGACCA
tRF-23-XSXMSL730H	-3.2162	1.49235e-22	5'-tRF	His-GTG	TGCCGTGATCGTATAGTGGTTAG
tRF-19-XSXMSL24	-3.38078	4.60676e-29	5'-tRF	His-GTG	TGCCGTGATCGTATAGTGG
tRF-24-FSXMSL732Z	-3.57495	2.00166e-21	5'-tRF	His-GTG	AGCCGTGATCGTATAGTGGTTAGT
tRF-22-XSXMSL73O	-3.70352	7.5296e-26	5'-tRF	His-GTG	TGCCGTGATCGTATAGTGGTTA
tRF-23-FSXMSL730H	-3.89752	4.60676e-29	5'-tRF	His-GTG	AGCCGTGATCGTATAGTGGTTAG
tRF-21-XSXMSL73E	-3.94933	5.80955e-32	5'-tRF	His-GTG	TGCCGTGATCGTATAGTGGTT
tRF-20-XSXMSL73	-4.01382	9.61308e-36	5'-tRF	His-GTG	TGCCGTGATCGTATAGTGGT
