# Supplementary material
Source: publisher figshare collection journal article supplement (https://future-science-group.figshare.com/articles/dataset/_/22132925)

a

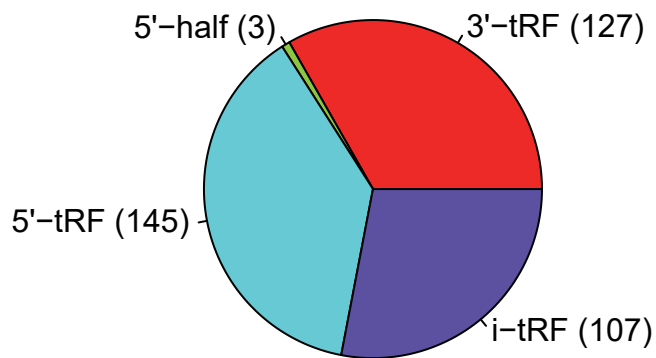

b

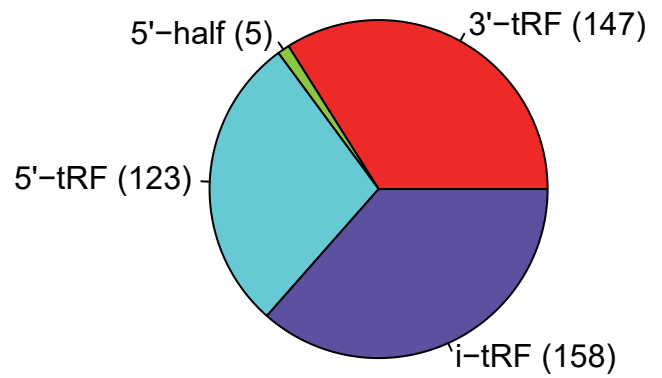

c

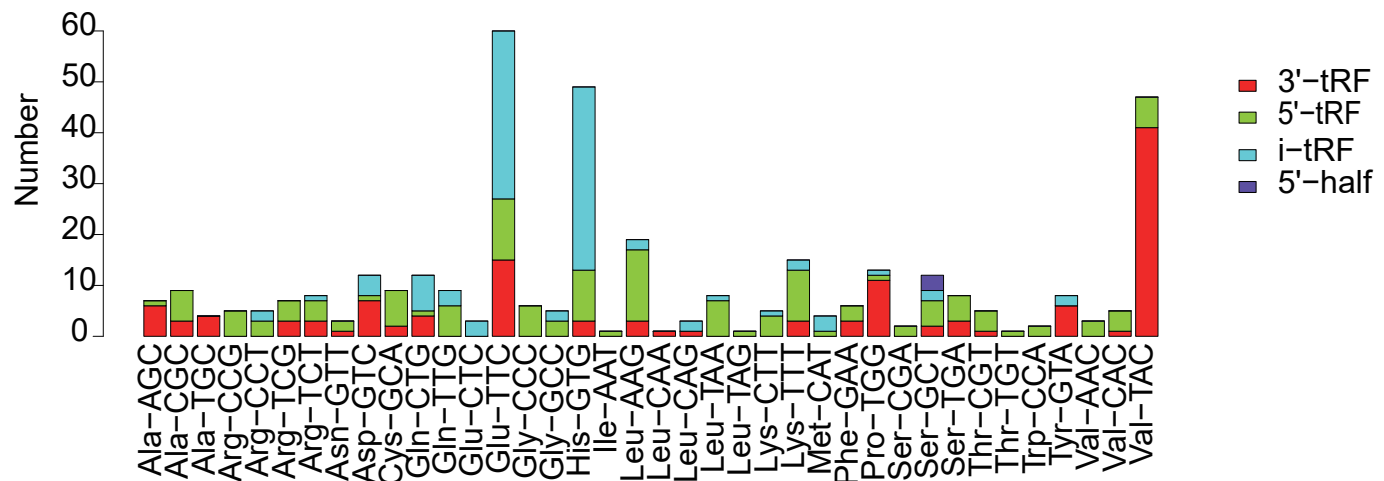

d

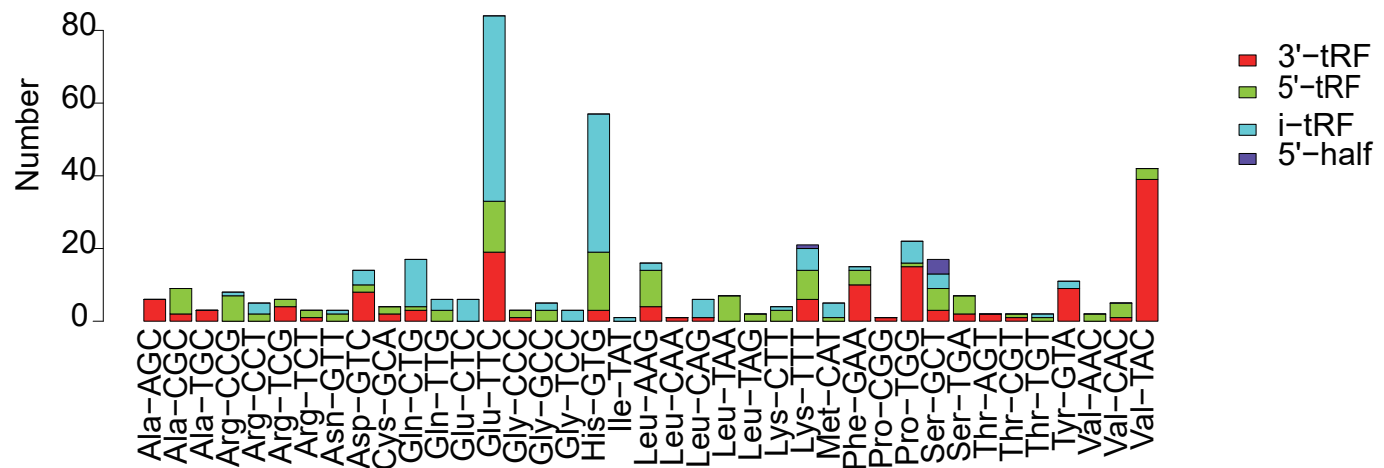

e

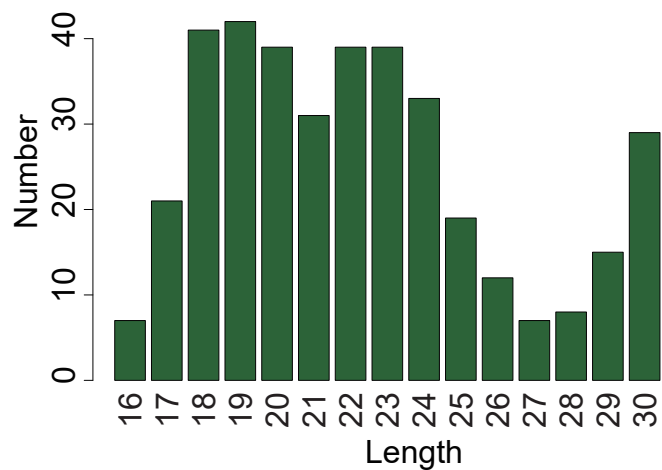

f

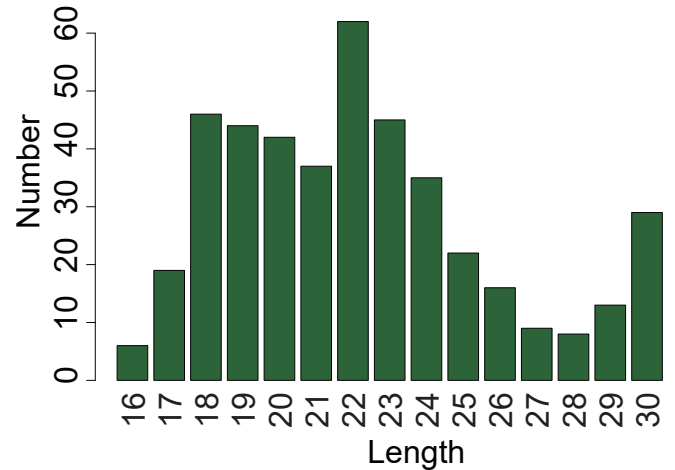

Supplement: Supplementary file 1 [file 1]

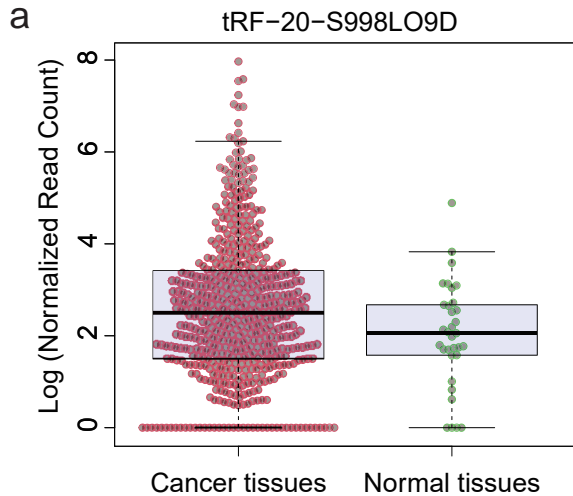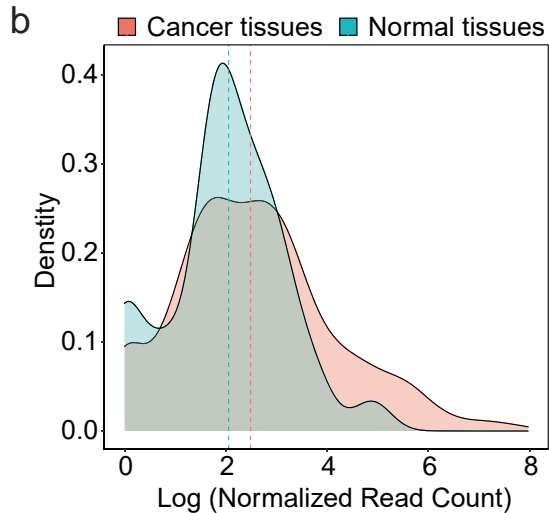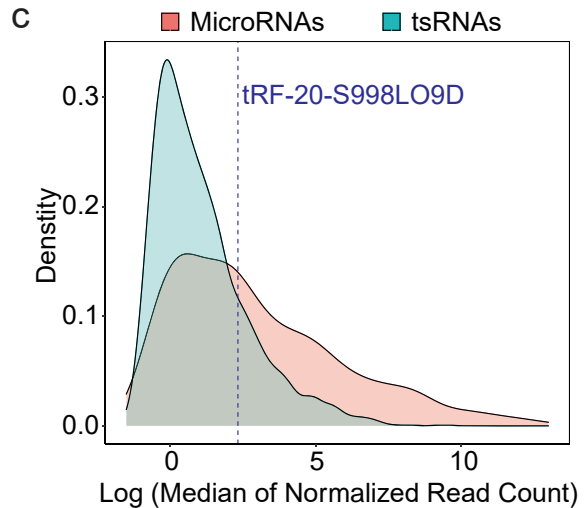

Supplement: Supplementary file 2 [file 1]
